# Supplementary material for: Large Scale Full-Length cDNA Sequencing Reveals a Unique Genomic Landscape in a Lepidopteran Model Insect, Bombyx mori
Source: PubMed Central journal article supplement (PMC3755909; doi:10.1534/g3.113.006239), 2013-09-01
Supplement: supp_g3.113.006239_TableS3.pdf [file supp_g3.113.006239_TableS3.pdf]

**Table S3 Summary of the chromosomal distribution of tissue-specific genes in each tissue.**

| Chromosome No.    | 1(Z) | 2  | 3  | 4  | 5  | 6  | 7  | 8  | 9  | 10 | 11 | 12 | 13 | 14 | 15 | 16 | 17 | 18 | 19 | 20 | 21 | 22 | 23 | 24 | 25 | 26 | 27 | 28 |   |
|-------------------|------|----|----|----|----|----|----|----|----|----|----|----|----|----|----|----|----|----|----|----|----|----|----|----|----|----|----|----|---|
| antenna           | 0    | 0  | 0  | 0  | 0  | 0  | 0  | 0  | 0  | 0  | 3  | 1  | 1  | 0  | 0  | 3  | 0  | 1  | 6  | 0  | 0  | 0  | 0  | 0  | 0  | 0  | 1  | 0  | 1 |
| brain             | 5    | 0  | 4  | 0  | 2  | 4  | 1  | 1  | 1  | 0  | 1  | 4  | 0  | 2  | 0  | 1  | 1  | 0  | 0  | 2  | 0  | 1  | 2  | 1  | 1  | 1  | 0  | 0  | 0 |
| compound eyes     | 0    | 0  | 0  | 2  | 0  | 0  | 0  | 0  | 0  | 0  | 0  | 1  | 0  | 0  | 0  | 0  | 0  | 0  | 0  | 0  | 1  | 1  | 0  | 0  | 0  | 0  | 0  | 1  | 0 |
| corpora allata    | 5    | 2  | 2  | 2  | 2  | 2  | 3  | 1  | 1  | 3  | 3  | 3  | 1  | 0  | 1  | 2  | 1  | 1  | 4  | 0  | 1  | 3  | 4  | 2  | 0  | 1  | 0  | 0  |   |
| maxillary galea   | 0    | 0  | 0  | 0  | 0  | 0  | 0  | 0  | 0  | 0  | 0  | 0  | 0  | 0  | 0  | 0  | 0  | 0  | 1  | 0  | 0  | 0  | 0  | 0  | 0  | 0  | 0  | 0  |   |
| wing              | 1    | 0  | 1  | 3  | 1  | 2  | 2  | 1  | 0  | 0  | 2  | 1  | 0  | 2  | 2  | 1  | 1  | 7  | 3  | 1  | 3  | 10 | 6  | 2  | 2  | 7  | 1  | 2  |   |
| wing disc         | 5    | 3  | 1  | 3  | 1  | 1  | 2  | 0  | 1  | 3  | 5  | 2  | 0  | 1  | 2  | 3  | 0  | 1  | 2  | 2  | 1  | 1  | 1  | 4  | 3  | 0  | 0  | 4  |   |
| testis            | 57   | 15 | 17 | 28 | 44 | 22 | 28 | 23 | 28 | 25 | 22 | 19 | 45 | 21 | 29 | 18 | 28 | 25 | 28 | 12 | 25 | 23 | 28 | 23 | 28 | 20 | 11 | 9  |   |
| ovary             | 0    | 33 | 0  | 0  | 0  | 1  | 0  | 0  | 1  | 4  | 0  | 2  | 0  | 0  | 10 | 6  | 0  | 0  | 3  | 1  | 0  | 0  | 3  | 1  | 0  | 1  | 0  | 1  |   |
| midgut            | 2    | 3  | 4  | 8  | 11 | 5  | 4  | 2  | 10 | 4  | 8  | 7  | 8  | 6  | 10 | 12 | 3  | 8  | 16 | 12 | 10 | 2  | 6  | 3  | 5  | 4  | 0  | 1  |   |
| malpighian tubule | 1    | 1  | 4  | 0  | 1  | 6  | 1  | 5  | 2  | 4  | 2  | 0  | 2  | 1  | 1  | 1  | 2  | 0  | 0  | 1  | 2  | 3  | 1  | 1  | 1  | 0  | 3  | 0  |   |
| pheromone gland   | 0    | 0  | 1  | 0  | 0  | 0  | 0  | 0  | 0  | 0  | 1  | 2  | 0  | 0  | 1  | 0  | 0  | 2  | 1  | 0  | 0  | 2  | 2  | 0  | 0  | 0  | 0  | 0  |   |
| silk gland        | 0    | 1  | 0  | 0  | 2  | 1  | 1  | 0  | 0  | 1  | 4  | 1  | 0  | 0  | 0  | 0  | 0  | 1  | 0  | 0  | 0  | 0  | 1  | 1  | 3  | 0  | 0  | 0  |   |
| fat body          | 0    | 0  | 0  | 0  | 2  | 1  | 0  | 1  | 0  | 0  | 0  | 0  | 1  | 0  | 0  | 0  | 0  | 0  | 0  | 3  | 0  | 0  | 1  | 0  | 1  | 1  | 0  | 2  |   |
| epidermis         | 0    | 0  | 0  | 0  | 3  | 1  | 1  | 1  | 0  | 0  | 2  | 0  | 0  | 0  | 0  | 0  | 0  | 4  | 0  | 0  | 0  | 5  | 1  | 1  | 0  | 1  | 0  | 0  |   |
| Verson's gland    | 0    | 0  | 0  | 0  | 0  | 0  | 0  | 0  | 0  | 0  | 0  | 0  | 0  | 0  | 0  | 0  | 0  | 0  | 0  | 0  | 0  | 0  | 0  | 0  | 0  | 0  | 0  | 0  |   |
| prothoracic gland | 0    | 0  | 0  | 0  | 0  | 0  | 0  | 0  | 0  | 0  | 0  | 0  | 0  | 0  | 0  | 0  | 0  | 0  | 0  | 0  | 0  | 0  | 0  | 0  | 0  | 0  | 0  | 0  |   |
| embryo            | 0    | 0  | 0  | 0  | 0  | 0  | 0  | 0  | 0  | 0  | 0  | 0  | 0  | 0  | 0  | 0  | 0  | 0  | 0  | 0  | 0  | 0  | 0  | 0  | 0  | 0  | 0  | 0  |   |
| cell              | 0    | 0  | 0  | 0  | 0  | 0  | 0  | 0  | 0  | 0  | 0  | 0  | 0  | 0  | 0  | 0  | 0  | 0  | 0  | 0  | 0  | 0  | 0  | 0  | 0  | 0  | 0  | 0  |   |

In silkworm, chromosome 1 is assigned to sex chromosome Z.
