# Supplementary material for: Large Scale Full-Length cDNA Sequencing Reveals a Unique Genomic Landscape in a Lepidopteran Model Insect, Bombyx mori
Source: PubMed Central journal article supplement (PMC3755909; doi:10.1534/g3.113.006239), 2013-09-01
Supplement: supp_g3.113.006239_TableS4.pdf [file supp_g3.113.006239_TableS4.pdf]

**Table S4 Mapping of *Bm osiris* genes.**

| Name             | Local gene ID | Chr. | Start      | End        | BmOsi expression   |
|------------------|---------------|------|------------|------------|--------------------|
| <i>Bmosi2</i>    | Gene015107    | 26   | 11,546,404 | 11,546,832 | No hit in EST      |
| <i>Bmosi3</i>    | Gene015109    | 26   | 11,575,601 | 11,598,597 | Wing-specific      |
| <i>Bmosi7</i>    | Gene015113    | 26   | 11,671,958 | 11,672,992 | Wing-specific      |
| <i>Bmosi9-1</i>  | Gene015114    | 26   | 11,684,158 | 11,693,923 | MSG/Wing-main      |
| <i>Bmosi9-2</i>  | Gene015115    | 26   | 11,719,076 | 11,724,428 | Wing-main          |
| <i>Bmosi9-3</i>  | Gene015116    | 26   | 11,734,389 | 11,739,610 | Epidermis-specific |
| <i>Bmosi9-4</i>  | Gene015118    | 26   | 11,750,726 | 11,757,781 | Wing-specific      |
| <i>Bmosi9-5</i>  | Gene015120    | 26   | 11,769,930 | 11,776,381 | Wing-specific      |
| <i>Bmosi8</i>    | Gene015122    | 26   | 11,781,935 | 11,791,287 | Wing-specific      |
| <i>Bmosi10</i>   | Gene015123    | 26   | 11,802,171 | 11,808,845 | No hit in EST      |
| <i>Bmosi11</i>   | Gene015124    | 26   | 11,813,011 | 11,814,641 | Wing-specific      |
| <i>Bmosi12</i>   | Gene015126    | 26   | 11,823,241 | 11,841,238 | Wing-specific      |
| <i>Bmosi16-1</i> | Gene015132    | 26   | 11,878,923 | 11,883,393 | No hit in EST      |
| <i>Bmosi16-2</i> | Gene015133    | 26   | 11,887,539 | 11,890,619 | No hit in EST      |
| <i>Bmosi17</i>   | Gene015135    | 26   | 11,907,284 | 11,950,051 | Wing-specific      |
| <i>Bmosi18</i>   | Gene015137    | 26   | 11,955,247 | 11,956,406 | Epidermis-main     |
| <i>Bmosi19</i>   | Gene014922    | 26   | 3,999,143  | 4,000,555  | Epidermis-main     |
| <i>Bmosi20</i>   | Gene014923    | 26   | 3,989,935  | 3,991,185  | Ovary-main         |
| <i>Bmosi21</i>   | Gene002044    | 4    | 10,844,311 | 10,845,881 | Wing-specific      |
| <i>Bmosi22</i>   | Gene007289    | 12   | 12,127,331 | 12,132,618 | Wing-specific      |
