# Supplementary material for: Large Scale Full-Length cDNA Sequencing Reveals a Unique Genomic Landscape in a Lepidopteran Model Insect, Bombyx mori
Source: PubMed Central journal article supplement (PMC3755909; doi:10.1534/g3.113.006239), 2013-09-01
Supplement: supp_g3.113.006239_TableS6.pdf [file supp_g3.113.006239_TableS6.pdf]

**Table S6 Result of Fisher's Exact Test to evaluate the association between type of a gene and type of its adjacent genes.**

|                             | Adjacent gene on at least one side is<br>tissue specific | Adjacent genes on both sides are<br>non tissue specific |
|-----------------------------|----------------------------------------------------------|---------------------------------------------------------|
| Gene is tissue specific     | 424                                                      | 858                                                     |
| Gene is non-tissue specific | 1,945                                                    | 12,602                                                  |

A one-tailed Fisher's Exact Test (Routledge 2005) was performed with a level of significance of  $P < 0.01$  to evaluate the association between the type of a gene and the type of its adjacent genes. The result was  $P=2.2e-16$ , *i.e.*, the null hypothesis can be rejected. There was a significant difference in the ratio of the type of adjacent genes between tissue specific and non-tissue specific genes, indicating a higher probability that a tissue-specific gene resides next to another tissue-specific gene than a non tissue-specific gene; *i.e.*, tissue-specific genes have a tendency to be clustered.
